# Supplementary material for: Explainable Machine Learning Model for Predicting First-Time Acute Exacerbation in Patients with Chronic Obstructive Pulmonary Disease
Source: MDPI journal article supplement (doi:10.3390/jpm12020228), 2022-02-07
Supplement: s1 [file s1]

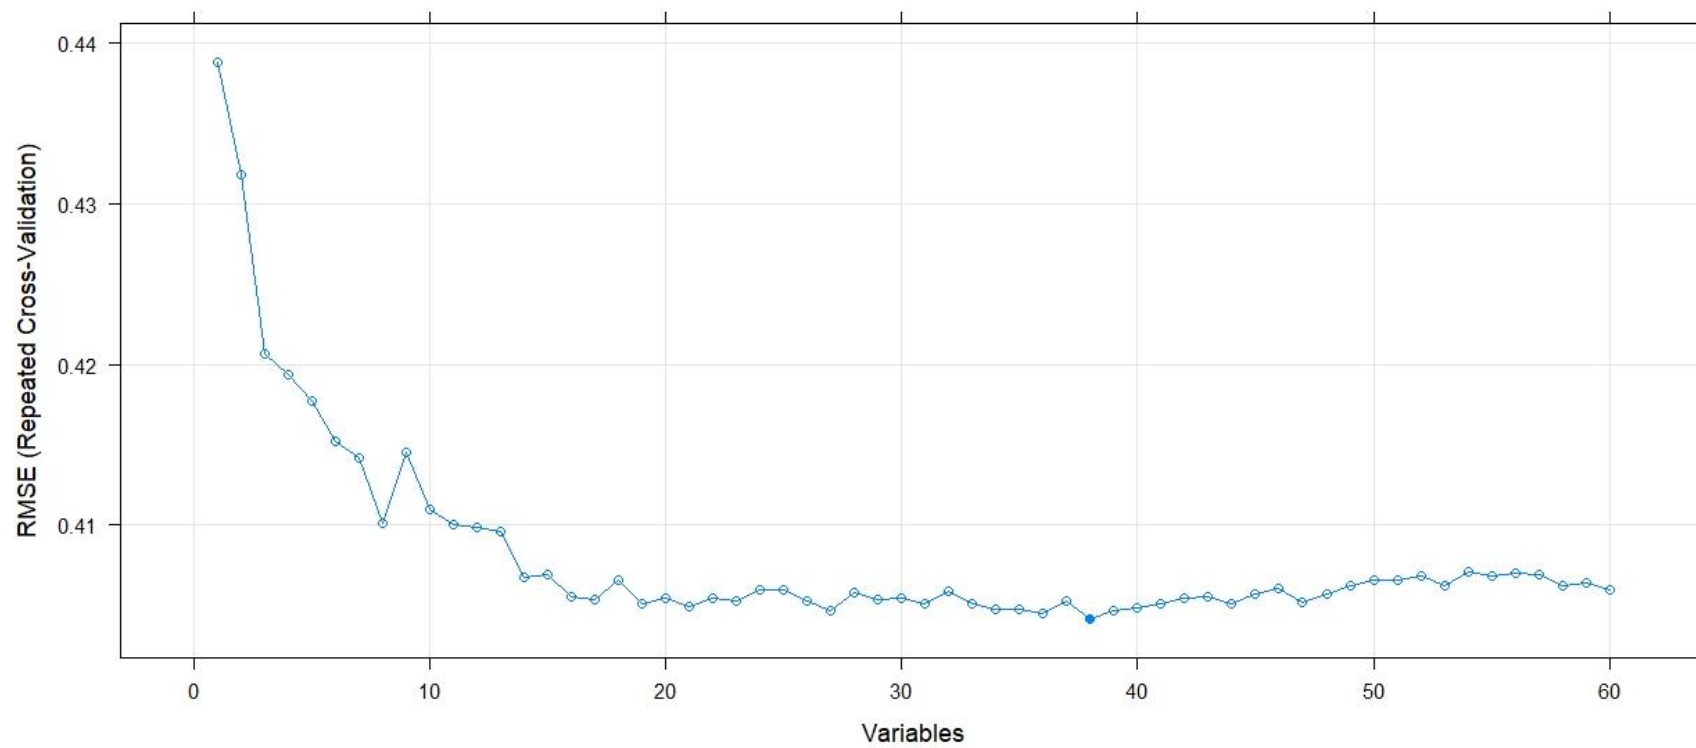

**Figure S1.** Feature selection based on random survival forest method and feature importance of selected features in training data.

**Table S1.** Model parameters for the various models

| Model                               | Parameters                                                                                                                                  |
|-------------------------------------|---------------------------------------------------------------------------------------------------------------------------------------------|
| Gradient boosted machines (GBMs)    | gbm package:distribution ="bernoulli"<br>n.trees =16<br>shrinkage = 0.39<br>interaction.depth =4<br>n.minobsinnode =5<br>bag.fraction= 0.67 |
| Extreme Gradient Boosting (XGBoost) | xgboost package:<br>objective = "binary:logistic"<br>nrounds =64<br>max_depth =3<br>eta = 0.39                                              |
| Random Forest (RF)                  | Random Forest package:<br>num.trees = 71,<br>mtry = 2,<br>min.node.size = 4                                                                 |
| Support Vector Machine (SVM)        | SVM package:<br>kernel="polynomial"<br>cost=1.01<br>degree=1<br>epsilon=0.9                                                                 |
